# Supplementary material for: Disruption of Daily Rhythms by High-Fat Diet Is Reversible
Source: PubMed Central journal article supplement (PMC4569368; doi:10.1371/journal.pone.0137970), 2015-09-14
Supplement: pone.0137970.s014.pdf [file pone.0137970.s014.pdf]

**S1 Table. Vector properties of locomotor activity rhythms in individual mice during diet reversal.**

|                                                           | Mouse ID | Day 37       | Day 38       | Day 39       | Day 40       | Day 41       | Day 42       | Day 49       |
|-----------------------------------------------------------|----------|--------------|--------------|--------------|--------------|--------------|--------------|--------------|
| <b>Mean Angle (<math>\mu</math>) <math>\pm</math> SD*</b> | <b>A</b> | 260 $\pm$ 72 | 236 $\pm$ 68 | 253 $\pm$ 78 | 240 $\pm$ 77 | 248 $\pm$ 70 | 240 $\pm$ 71 | 266 $\pm$ 75 |
|                                                           | <b>B</b> | 257 $\pm$ 76 | 252 $\pm$ 75 | 262 $\pm$ 72 | 271 $\pm$ 86 | 253 $\pm$ 85 | 255 $\pm$ 88 | 268 $\pm$ 75 |
|                                                           | <b>C</b> | 279 $\pm$ 69 | 268 $\pm$ 67 | 258 $\pm$ 74 | 269 $\pm$ 75 | 261 $\pm$ 68 | 264 $\pm$ 76 | 254 $\pm$ 77 |
|                                                           | <b>D</b> | 270 $\pm$ 70 | 257 $\pm$ 73 | 260 $\pm$ 79 | 268 $\pm$ 73 | 264 $\pm$ 69 | 270 $\pm$ 73 | 266 $\pm$ 82 |
|                                                           | <b>E</b> | 265 $\pm$ 79 | 256 $\pm$ 70 | 244 $\pm$ 68 | 250 $\pm$ 74 | 252 $\pm$ 72 | 252 $\pm$ 68 | 254 $\pm$ 72 |
| <b>Length (r)*</b>                                        | <b>A</b> | 0.45         | 0.49         | 0.40         | 0.40         | 0.48         | 0.46         | 0.43         |
|                                                           | <b>B</b> | 0.41         | 0.43         | 0.45         | 0.33         | 0.33         | 0.30         | 0.43         |
|                                                           | <b>C</b> | 0.49         | 0.51         | 0.43         | 0.42         | 0.49         | 0.41         | 0.41         |
|                                                           | <b>D</b> | 0.47         | 0.44         | 0.38         | 0.45         | 0.48         | 0.46         | 0.36         |
|                                                           | <b>E</b> | 0.39         | 0.47         | 0.49         | 0.43         | 0.46         | 0.49         | 0.45         |

\*The mean angle ( $\mu$ )  $\pm$  circular standard deviation (SD) and vector length (r) are reported are for individual mice. \*Rayleigh's Uniformity test was used to determine if the locomotor activity of individual mice had a significant non-uniform direction (all vectors were  $p < 1 \times 10^{-12}$ ).
